# Supplementary material for: Detecting Cotton Leaf Curl Virus Resistance Quantitative Trait Loci in Gossypium hirsutum and iCottonQTL a New R/Shiny App to Streamline Genetic Mapping
Source: MDPI journal article supplement (doi:10.3390/plants12051153), 2023-03-03
Supplement: s1 [file s1]

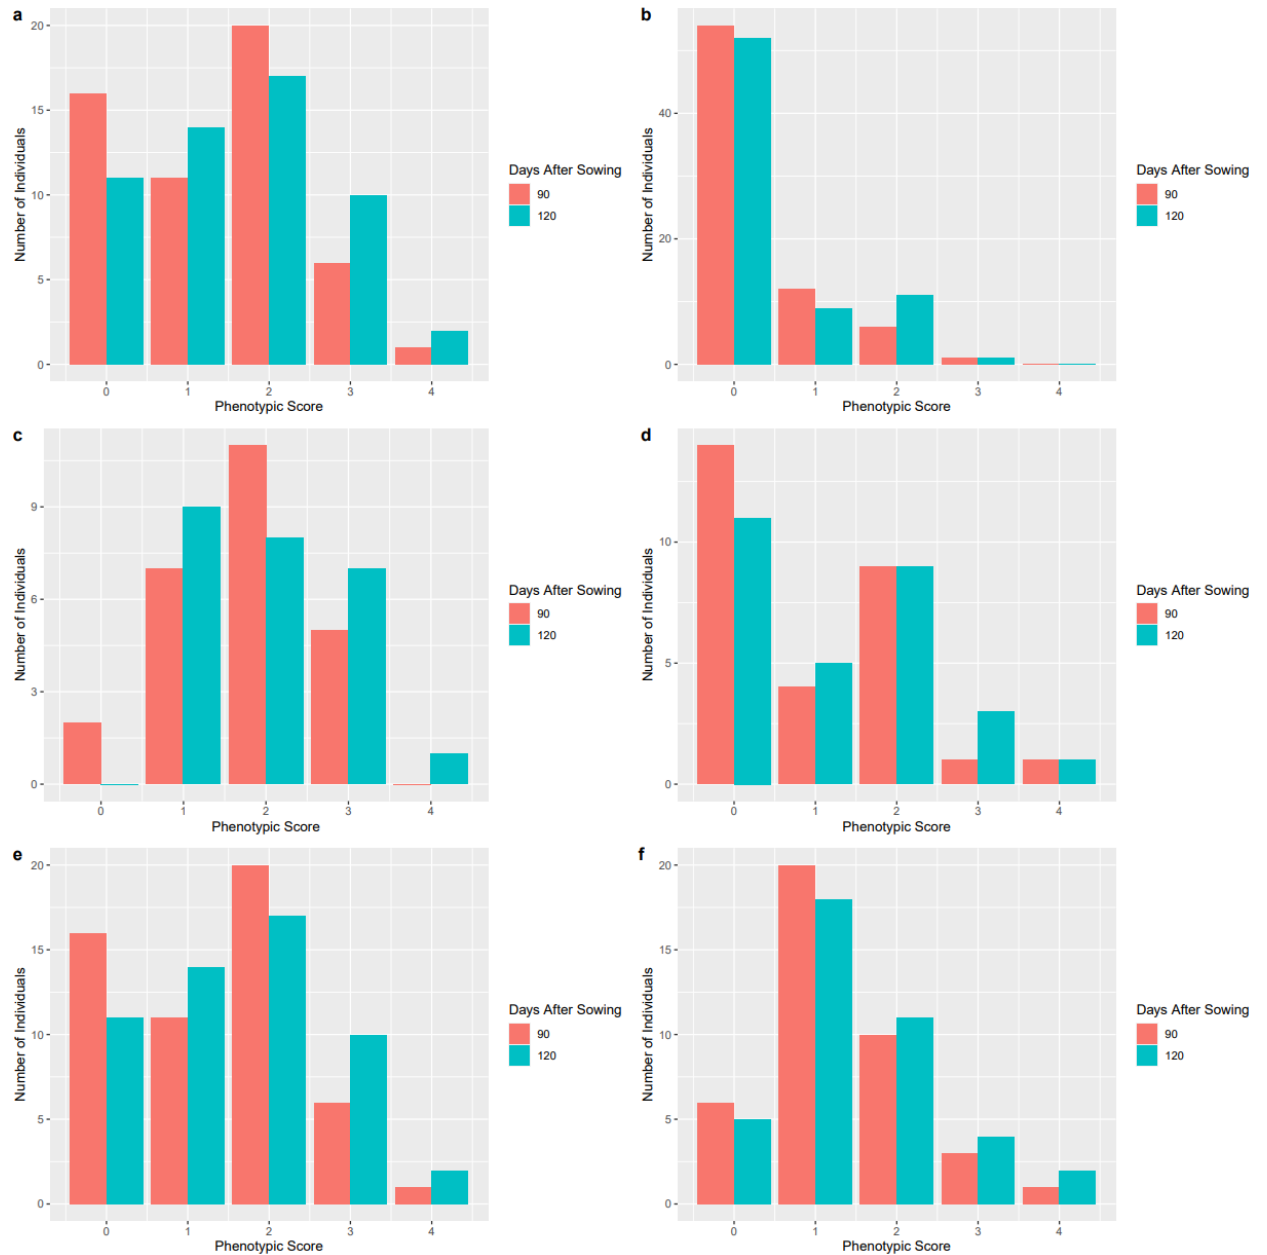

**Figure S1: Distribution of Phenotypes for Population and Combined Populations.** The number of individuals for each phenotypic score at 90 Days after Sowing (DAS) shown in blue and 120 DAS shown in gray in each graph. Phenotypic distributions shown for (a) Population 1, (b) Population 2 and 3, (c) Population 4, (d) Population 5, (e) Population 4 and 5, and (f) Population 6.

**Table S1: Details of Linkage Groups for each population.** Number of linkage groups, total markers, and total length of linkage groups are listed by chromosome for each mapping population.

| Population | Chromosome | #<br>Groups | of | Total #<br>of Loci | Total<br>Contig<br>Length |
|------------|------------|-------------|----|--------------------|---------------------------|
|            | 1          | 1           | 1  | 275                | 826.9                     |
|            | 1          | 2           | 3  | 94                 | 289.6                     |
|            | 1          | 3           | 3  | 123                | 425                       |
|            | 1          | 4           | 1  | 148                | 831.5                     |
|            | 1          | 5           | 4  | 257                | 969.6                     |
|            | 1          | 6           | 3  | 209                | 703.8                     |
|            | 1          | 7           | 1  | 41                 | 164.6                     |
|            | 1          | 8           | 3  | 227                | 612.4                     |
|            | 1          | 9           | 3  | 190                | 810.1                     |
|            | 1          | 10          | 3  | 209                | 810.3                     |
|            | 1          | 11          | 4  | 270                | 1169.9                    |
|            | 1          | 12          | 1  | 217                | 1114.4                    |
|            | 1          | 13          | 2  | 234                | 691.5                     |
|            | 1          | 14          | 5  | 188                | 725.8                     |
|            | 1          | 15          | 2  | 163                | 669.3                     |
|            | 1          | 16          | 3  | 256                | 966.6                     |
|            | 1          | 17          | 4  | 89                 | 386                       |
|            | 1          | 18          | 2  | 222                | 811.5                     |
|            | 1          | 19          | 5  | 335                | 1385.2                    |
|            | 1          | 20          | 2  | 282                | 1057.4                    |
|            | 1          | 21          | 4  | 210                | 917.3                     |
|            | 1          | 22          | 3  | 126                | 579.1                     |
|            | 1          | 23          | 1  | 218                | 874.6                     |
|            | 1          | 24          | 4  | 253                | 810.6                     |
|            | 1          | 25          | 2  | 209                | 716.2                     |
|            | 1          | 26          | 1  | 295                | 1069.94                   |
|            | 2&3        | 1           | 1  | 57                 | 535                       |
|            | 2&3        | 2           | 1  | 52                 | 10272.9                   |
|            | 2&3        | 3           | 1  | 303                | 1004.6                    |
|            | 2&3        | 4           | 1  | 164                | 737.6                     |
|            | 2&3        | 5           | 1  | 366                | 1309.2                    |
|            | 2&3        | 6           | 1  | 157                | 608.9                     |
|            | 2&3        | 7           | 1  | 294                | 942                       |
|            | 2&3        | 8           | 1  | 477                | 1038                      |
|            | 2&3        | 9           | 1  | 129                | 645                       |
|            | 2&3        | 10          | 1  | 307                | 918.6                     |
|            | 2&3        | 11          | 1  | 307                | 1066                      |
|            | 2&3        | 12          | 1  | 220                | 994                       |

|       |    |   |     |         |
|-------|----|---|-----|---------|
| 2&3   | 13 | 2 | 57  | 191.7   |
| 2&3   | 14 | 1 | 345 | 978.7   |
| 2&3   | 15 | 1 | 219 | 777.8   |
| 2&3   | 16 | 4 | 345 | 858.4   |
| 2&3   | 17 | 1 | 214 | 585     |
| 2&3   | 18 | 2 | 246 | 745.6   |
| 2&3   | 19 | 2 | 212 | 805     |
| 2&3   | 20 | 0 |     |         |
| 2&3   | 21 | 2 | 198 | 714.7   |
| 2&3   | 22 | 1 | 94  | 483.5   |
| 2&3   | 23 | 2 | 123 | 571.5   |
| 2&3   | 24 | 1 | 375 | 1071    |
| 2&3   | 25 | 1 | 219 | 744.9   |
| 2&3   | 26 | 1 | 217 | 1100.9  |
| 4     | 1  | 2 | 140 | 603.9   |
| 4     | 2  | 2 | 64  | 156     |
| 4     | 3  | 3 | 76  | 353.5   |
| 4     | 4  | 2 | 74  | 393.5   |
| 4     | 5  | 7 | 146 | 734.6   |
| 4     | 6  | 6 | 87  | 237.9   |
| 4     | 7  | 5 | 102 | 356.2   |
| 4     | 8  | 5 | 123 | 356.4   |
| 4     | 9  | 5 | 115 | 368     |
| 4     | 10 | 3 | 107 | 447     |
| 4     | 11 | 6 | 100 | 286.48  |
| 4     | 12 | 4 | 99  | 379.9   |
| 4     | 13 | 2 | 58  | 186.6   |
| 4     | 14 | 2 | 108 | 10318.7 |
| 4     | 15 | 4 | 81  | 383.9   |
| 4     | 16 | 6 | 106 | 253.5   |
| 4     | 17 | 3 | 56  | 129.4   |
| 4     | 18 | 3 | 81  | 284.5   |
| 4     | 19 | 4 | 95  | 355     |
| 4     | 20 | 4 | 121 | 374.8   |
| 4     | 21 | 6 | 100 | 458.6   |
| 4     | 22 | 1 | 31  | 83.6    |
| 4     | 23 | 5 | 114 | 324.7   |
| 4     | 24 | 1 | 123 | 457.59  |
| 4     | 25 | 3 | 94  | 411.4   |
| 4     | 26 | 3 | 106 | 373.6   |
| <hr/> |    |   |     |         |
| 5     | 1  | 1 | 147 | 274.2   |
| 5     | 2  | 1 | 43  | 188.4   |
| 5     | 3  | 1 | 113 | 10302.2 |
| 5     | 4  | 2 | 50  | 142.7   |
| 5     | 5  | 4 | 111 | 10450.3 |
| <hr/> |    |   |     |         |

|       |    |   |     |         |
|-------|----|---|-----|---------|
| 5     | 6  | 3 | 71  | 216.3   |
| 5     | 7  | 2 | 58  | 217     |
| 5     | 8  | 2 | 91  | 10244.1 |
| 5     | 9  | 4 | 95  | 313.6   |
| 5     | 10 | 2 | 94  | 358.8   |
| 5     | 11 | 7 | 129 | 10195.5 |
| 5     | 12 | 4 | 90  | 10277   |
| 5     | 13 | 1 | 131 | 415.9   |
| 5     | 14 | 1 | 106 | 372.2   |
| 5     | 15 | 2 | 70  | 287     |
| 5     | 16 | 2 | 65  | 322.8   |
| 5     | 17 | 3 | 62  | 190.4   |
| 5     | 18 | 2 | 88  | 377.3   |
| 5     | 19 | 2 | 129 | 450.1   |
| 5     | 20 | 3 | 125 | 259.6   |
| 5     | 21 | 2 | 87  | 291.2   |
| 5     | 22 | 1 | 83  | 316.7   |
| 5     | 23 | 1 | 71  | 304.4   |
| 5     | 24 | 1 | 127 | 397.8   |
| 5     | 25 | 1 | 82  | 247.9   |
| 5     | 26 | 1 | 106 | 492.1   |
| <hr/> |    |   |     |         |
| 4&5   | 1  | 2 | 270 | 605     |
| 4&5   | 2  | 3 | 102 | 242     |
| 4&5   | 3  | 1 | 168 | 479     |
| 4&5   | 4  | 1 | 114 | 461     |
| 4&5   | 5  | 3 | 180 | 868     |
| 4&5   | 6  | 4 | 161 | 561     |
| 4&5   | 7  | 3 | 145 | 429     |
| 4&5   | 8  | 3 | 201 | 410     |
| 4&5   | 9  | 2 | 172 | 618     |
| 4&5   | 10 | 2 | 172 | 694.3   |
| 4&5   | 11 | 2 | 234 | 527     |
| 4&5   | 12 | 1 | 136 | 662     |
| 4&5   | 13 | 3 | 238 | 446.8   |
| 4&5   | 14 | 3 | 192 | 524     |
| 4&5   | 15 | 2 | 129 | 485     |
| 4&5   | 16 | 3 | 208 | 636.2   |
| 4&5   | 17 | 2 | 113 | 400     |
| 4&5   | 18 | 2 | 164 | 495     |
| 4&5   | 19 | 4 | 245 | 716.5   |
| 4&5   | 20 | 2 | 231 | 678     |
| 4&5   | 21 | 1 | 173 | 940     |
| 4&5   | 22 | 2 | 129 | 506.5   |
| 4&5   | 23 | 2 | 143 | 482     |
| 4&5   | 24 | 2 | 242 | 570     |
| <hr/> |    |   |     |         |

|     |    |   |     |       |
|-----|----|---|-----|-------|
| 4&5 | 25 | 1 | 152 | 462   |
| 4&5 | 26 | 1 | 216 | 730   |
| 6   | 1  | 2 | 156 | 612.4 |
| 6   | 2  | 1 | 81  | 251.6 |
| 6   | 3  | 1 | 70  | 402.3 |
| 6   | 4  | 2 | 21  | 90.3  |
| 6   | 5  | 2 | 106 | 490.4 |
| 6   | 6  | 2 | 90  | 366.4 |
| 6   | 7  | 2 | 83  | 358.9 |
| 6   | 8  | 1 | 297 | 839   |
| 6   | 9  | 3 | 131 | 445.1 |
| 6   | 10 | 1 | 46  | 216.6 |
| 6   | 11 | 3 | 116 | 525.6 |
| 6   | 12 | 2 | 66  | 382.6 |
| 6   | 13 | 2 | 152 | 578.1 |
| 6   | 14 | 2 | 96  | 311.2 |
| 6   | 15 | 2 | 56  | 349.3 |
| 6   | 16 | 2 | 78  | 10295 |
| 6   | 17 | 1 | 15  | 100   |
| 6   | 18 | 1 | 33  | 173   |
| 6   | 19 | 2 | 119 | 552.2 |
| 6   | 20 | 1 | 21  | 78    |
| 6   | 21 | 1 | 72  | 381.8 |
| 6   | 22 | 1 | 106 | 477.2 |
| 6   | 23 | 1 | 118 | 399.2 |
| 6   | 24 | 1 | 42  | 236   |
| 6   | 25 | 1 | 32  | 282   |
| 6   | 26 | 2 | 42  | 319.2 |

LG24

Previously\_Published\_Order

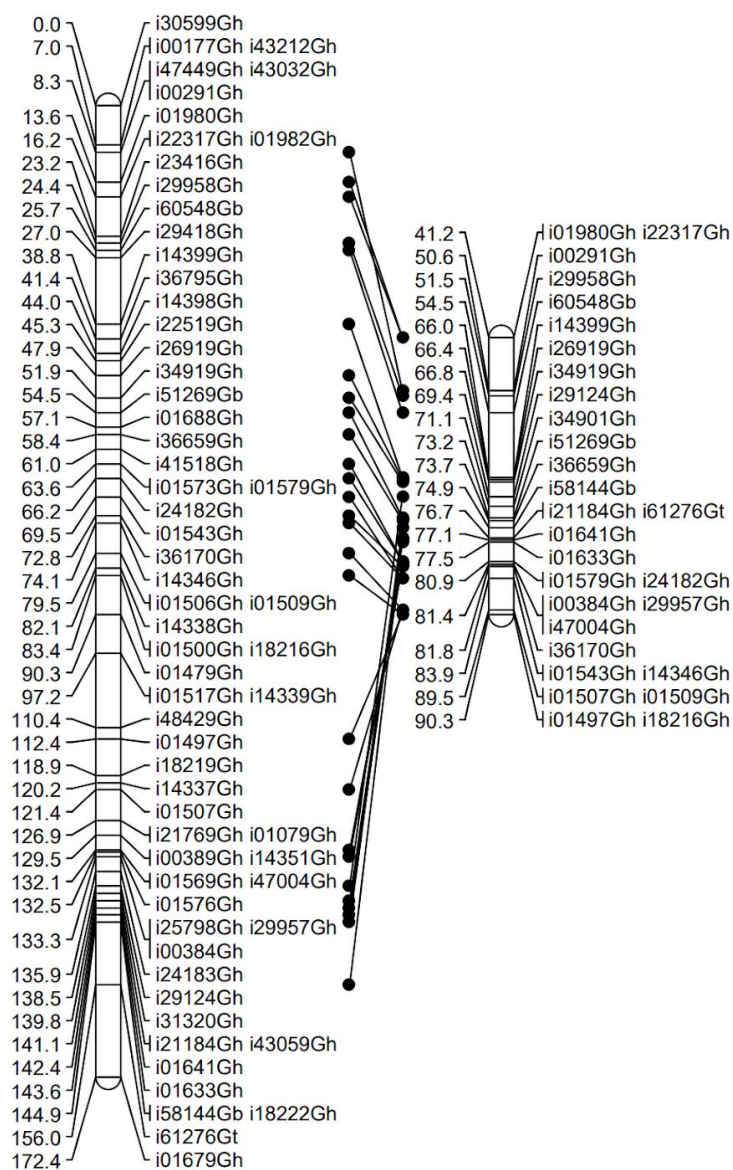

**Figure S2: Linkage mapping marker synteny.** MapChart comparison of linkage group order from this study (left) with previously published linkage group order (right) [11]. Distances are listed in centiMorgans. Example shown for LG24 from Population 6.

**Table S2: Significant Markers across all populations.** Test Run ID indicates the method of grouping the phenotypic score and JoinMap results. Besides the typical method with all raw data 1) “Normal”, the rest of the test run IDs are running the analysis using four different additional methods categorized as following: 2) “mapped only” - only the markers that were in linkage groups (as MapQTL’s input files require the original JoinMap .loc file which typically contains all of the markers that originally went into JoinMap, for this set all of the markers that did not make it into the linkage groups were also removed from this file); 3) “Data Regrouped [0,1] \* [3,4]” - clustering similar phenotypes together such as 3 and 4 being denoted as the same phenotype; 4) “Data Regrouped [0] [1,4]” - changing the phenotypes to be either 0 – no disease – or 4 – having the disease; and 5) “Real Loc” - exchanging the marker positions obtained in this study with those obtained by linkage mapping of larger-sized segregating positions, ie. potentially more accurate positions, found in Hulse-Kemp et al. (2015). The marker group and marker group position refer to the group number from the JoinMap results. Genome Chromosome refers back to the appropriate chromosome the group maps back to.

| Test ID                      | Run     | Population | Marker   | Marker Group # | Marker Group Position | LOD  | Genome Chromosome | Variance | Percent Explained | Allele Parent |
|------------------------------|---------|------------|----------|----------------|-----------------------|------|-------------------|----------|-------------------|---------------|
| Normal                       | 1       |            | i60979Gt | 36             | 1.502                 | 3.23 | 8                 | 0.82684  | 33.8              | TX1214        |
| Data Regrouped [0,1] * [3,4] | 1       |            | i04503Gh | 36             | 0                     | 3.45 | 8                 | 1.36385  | 51.5              | TX1214        |
| Normal                       | 2 and 3 |            | i28523Gh | 6              | 805.34                | 3.09 | 10                | 0.520394 | 17.7              | TX1145        |
| Normal                       | 2 and 3 |            | i18794Gh | 10             | 76.495                | 3    | 24                | 0.523349 | 17.2              | TX1145        |
| Data Regrouped [0,1] * [3,4] | 2 and 3 |            | i19232Gh | 27             | 450.205               | 4.87 | 9                 | 0.176788 | 30.4              | TX1145        |
| Real Loc                     | 2 and 3 |            | i54072Gb | 6              | 117.2                 | 3.09 | 10                | 0.520394 | 17.7              | TX1145        |
| Real Loc                     | 2 and 3 |            | i61540Gt | 6              | 117.6                 | 3.02 | 10                | 0.522684 | 17.3              | TX1145        |
| Real Loc                     | 2 and 3 |            | i63736Gm | 6              | 117.6                 | 3.02 | 10                | 0.522684 | 17.3              | TX1145        |
| Data Regrouped [0] [1,4]     | 2 and 3 |            | i11809Gh | 6              | 318.488               | 3.03 | 10                | 2.70861  | 17.4              | TX1145        |
| Data Regrouped [0] [1,4]     | 2 and 3 |            | i40202Gh | 6              | 201.424               | 3.28 | 10                | 2.66535  | 18.7              | TX1145        |
| Data Regrouped [0] [1,4]     | 2 and 3 |            | i29192Gh | 6              | 795.582               | 3.17 | 10                | 2.68485  | 18.1              | TX1145        |
| Data Regrouped [0] [1,4]     | 2 and 3 |            | i60707Gt | 21             | 486.09                | 3.25 | 15                | 2.67096  | 18.5              | TX1145        |

|                                    |         |          |    |         |      |    |         |      |           |
|------------------------------------|---------|----------|----|---------|------|----|---------|------|-----------|
| Data<br>Regrouped<br>[0] [1,4]     | 2 and 3 | i19282Gh | 24 | 501.557 | 3.22 | 21 | 2.67589 | 18.4 | TX1145    |
| Data<br>Regrouped<br>[0,1] * [3,4] | 5       | i37027Gh | 27 | 104.098 | 3.5  | 16 | 1.14286 | 55.4 | TX1145    |
| Data<br>Regrouped<br>[0,1] * [3,4] | 5       | i01975Gh | 27 | 104.098 | 3.5  | 16 | 1.14286 | 55.4 | TX1145    |
| Data<br>Regrouped<br>[0,1] * [3,4] | 5       | i35622Gh | 27 | 134.712 | 3.5  | 16 | 1.14286 | 55.4 | TX1145    |
| Data<br>Regrouped<br>[0,1] * [3,4] | 5       | i00262Gh | 27 | 134.712 | 3.5  | 16 | 1.14286 | 55.4 | TX1145    |
| Data<br>Regrouped<br>[0,1] * [3,4] | 5       | i41454Gh | 27 | 134.712 | 3.5  | 16 | 1.14286 | 55.4 | TX1145    |
| Data<br>Regrouped<br>[0,1] * [3,4] | 5       | i20534Gh | 27 | 105.866 | 3.29 | 16 | 1.2     | 53.1 | TX1145    |
| Data<br>Regrouped<br>[0,1] * [3,4] | 6       | i37586Gh | 23 | 176.87  | 4.44 | 3  | 1.29746 | 50.6 | Mac7-0238 |
| Data<br>Regrouped<br>[0,1] * [3,4] | 6       | i29922Gh | 23 | 166.646 | 3.36 | 3  | 1.54023 | 41.3 | Mac7-0238 |
| Data<br>Regrouped<br>[0,1] * [3,4] | 6       | i30334Gh | 23 | 166.646 | 3.36 | 3  | 1.54023 | 41.3 | Mac7-0238 |
| Data<br>Regrouped<br>[0,1] * [3,4] | 6       | i26736Gh | 23 | 166.646 | 3.36 | 3  | 1.54023 | 41.3 | Mac7-0238 |
| Data<br>Regrouped<br>[0,1] * [3,4] | 6       | i25691Gh | 23 | 167.919 | 3.36 | 3  | 1.54023 | 41.3 | Mac7-0238 |
| Data<br>Regrouped<br>[0,1] * [3,4] | 6       | i03489Gh | 23 | 175.596 | 3.36 | 3  | 1.54023 | 41.3 | Mac7-0238 |
| Data<br>Regrouped<br>[0,1] * [3,4] | 6       | i28633Gh | 7  | 110.34  | 3.27 | 5  | 1.56305 | 40.5 | Mac7-0238 |
| Data<br>Regrouped<br>[0,1] * [3,4] | 6       | i09765Gh | 7  | 108.861 | 3.14 | 5  | 1.59387 | 39.3 | Mac7-0238 |



|               |   |          |    |         |      |    |  |         |      |  |           |  |
|---------------|---|----------|----|---------|------|----|--|---------|------|--|-----------|--|
| Data          |   |          |    |         |      |    |  |         |      |  |           |  |
| Regrouped     | 6 | i46424Gh | 7  | 108.861 | 3.14 | 5  |  | 1.59387 | 39.3 |  | Mac7-0238 |  |
| [0,1] * [3,4] |   |          |    |         |      |    |  |         |      |  |           |  |
| Data          |   |          |    |         |      |    |  |         |      |  |           |  |
| Regrouped     | 6 | i21184Gh | 24 | 141.096 | 3.14 | 16 |  | 1.59387 | 39.3 |  | Mac7-0238 |  |
| [0,1] * [3,4] |   |          |    |         |      |    |  |         |      |  |           |  |
| Data          |   |          |    |         |      |    |  |         |      |  |           |  |
| Regrouped     | 6 | i43059Gh | 24 | 141.096 | 3.14 | 16 |  | 1.59387 | 39.3 |  | Mac7-0238 |  |
| [0,1] * [3,4] |   |          |    |         |      |    |  |         |      |  |           |  |

**Table S3: Plate layout for the testing plate for the KASP markers.** Rep indicates technical replicate of the sample originally found, such as rep A1 indicates technical replicate of cell A1 sample. NTC indicates non-template control.

|          | 1                         | 2                         | 3                         | 4                            | 5                                | 6                                | 7                            | 8                                | 9                                 | 10      | 11      | 12      |
|----------|---------------------------|---------------------------|---------------------------|------------------------------|----------------------------------|----------------------------------|------------------------------|----------------------------------|-----------------------------------|---------|---------|---------|
| <b>A</b> | MD26n<br>e                | rep H1<br>- TX<br>1145    | TX121<br>4                | TX2425                       | MD26n<br>e x<br>TX1145<br>F1     | Mac7 -<br>1238 x<br>TX1145<br>F1 | MD26n<br>e x<br>TX1145<br>F2 | MD26n<br>e x<br>TX1214<br>F2     | Mac7 -<br>1238 x<br>TX114<br>5 F2 | NT<br>C | NT<br>C | NT<br>C |
| <b>B</b> | rep A1<br>-<br>MD26n<br>e | TX<br>1145                | Mac7 -<br>1238            | rep A4<br>- TX<br>2425       | Mac7-<br>1238 x<br>MD26n<br>e F1 | Mac7 -<br>1238 x<br>TX1145<br>F1 | MD26n<br>e x<br>TX1145<br>F2 | MD26n<br>e x<br>TX1214<br>F2     | Mac7 -<br>1238 x<br>TX114<br>5 F2 | NT<br>C | NT<br>C | NT<br>C |
| <b>C</b> | MD26n<br>e                | TX<br>1145                | rep B3<br>- Mac7<br>-1238 | TX<br>2452                   | Mac7-<br>1238 x<br>MD26n<br>e F1 | MD26n<br>e x<br>TX1145<br>F2     | MD26n<br>e x<br>TX1145<br>F2 | MD26n<br>e x<br>TX1214<br>F2     | Mac7 -<br>1238 x<br>TX114<br>5 F2 | NT<br>C | NT<br>C | NT<br>C |
| <b>D</b> | rep C1 -<br>MD26n<br>e    | TX121<br>4                | Mac7 -<br>1238            | rep C4 -<br>TX<br>2452       | Mac7-<br>1238 x<br>MD26n<br>e F1 | MD26n<br>e x<br>TX1145<br>F2     | MD26n<br>e x<br>TX1145<br>F2 | MD26n<br>e x<br>TX1214<br>F2     | Mac7 -<br>1238 x<br>TX114<br>5 F2 | NT<br>C | NT<br>C | NT<br>C |
| <b>E</b> | MD26n<br>e                | rep<br>D2 -<br>TX<br>1214 | rep D3<br>- Mac7<br>-1238 | TX<br>2452                   | MD26n<br>e x<br>TX1214<br>F1     | MD26n<br>e x<br>TX1145<br>F2     | MD26n<br>e x<br>TX1214<br>F2 | MD26n<br>e x<br>TX1214<br>F2     | Mac7 -<br>1238 x<br>TX114<br>5 F2 | NT<br>C | NT<br>C | NT<br>C |
| <b>F</b> | TX<br>1145                | TX121<br>4                | Mac7 -<br>1238            | rep E4 -<br>TX<br>2452       | MD26n<br>e x<br>TX1214<br>F1     | MD26n<br>e x<br>TX1145<br>F2     | MD26n<br>e x<br>TX1214<br>F2 | MD26n<br>e x<br>TX1214<br>F2     | Mac7 -<br>1238 x<br>TX114<br>5 F2 | NT<br>C | NT<br>C | NT<br>C |
| <b>G</b> | rep F1 -<br>TX<br>1145    | rep<br>F2 -<br>TX<br>1214 | TX242<br>5                | MD26n<br>e x<br>TX1145<br>F1 | MD26n<br>e x<br>TX1214<br>F1     | MD26n<br>e x<br>TX1145<br>F2     | MD26n<br>e x<br>TX1214<br>F2 | Mac7 -<br>1238 x<br>TX1145<br>F2 | Mac7 -<br>1238 x<br>TX114<br>5 F2 | NT<br>C | NT<br>C | NT<br>C |
| <b>H</b> | TX<br>1145                | TX121<br>4                | rep G3<br>- TX<br>2425    | MD26n<br>e x<br>TX1145<br>F1 | Mac7 -<br>1238 x<br>TX1145<br>F1 | MD26n<br>e x<br>TX1145<br>F2     | MD26n<br>e x<br>TX1214<br>F2 | Mac7 -<br>1238 x<br>TX1145<br>F2 | Mac7 -<br>1238 x<br>TX114<br>5 F2 | NT<br>C | NT<br>C | NT<br>C |



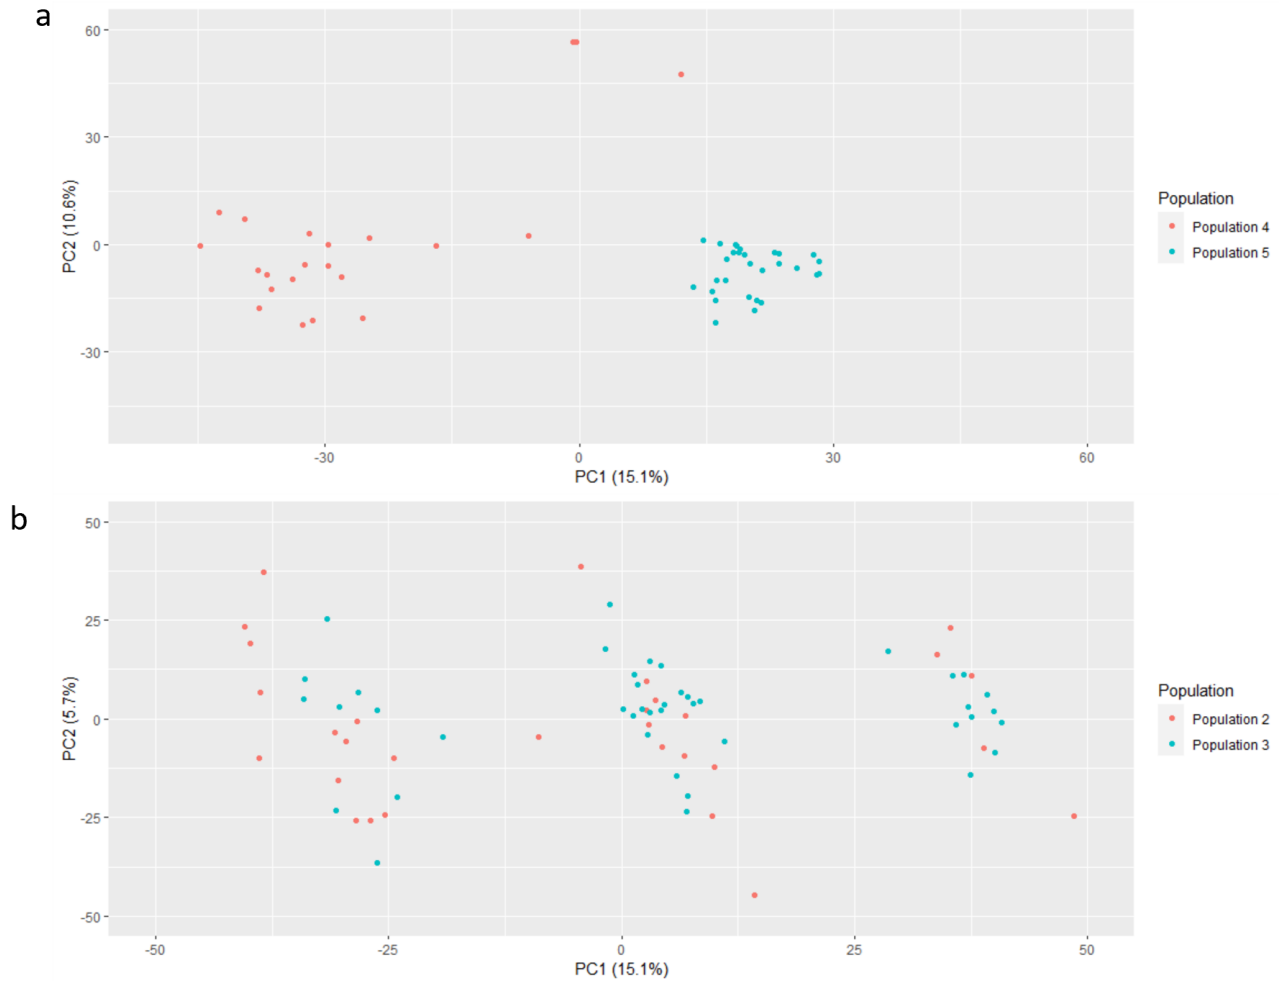

**Figure S4: Principal Component Analysis plots of the individuals from combined populations 2-5.** For each population, markers were filtered according to their status of polymorphism between the two parents' homozygous markers. The F2 genetic data was assigned into A, B, and H format for each SNP according to whether the SNP was homozygous matching parent A, parent B, or was heterozygous. ABH format SNPs were assigned numerical values of 0, 2, and 1 respectively. Missing values were assigned the average of the known values for its respective SNP. **(a)** PCA of the combined Populations 2 and 3. **(b)** PCA of the combined Populations 4 and 5.
